# Supplementary material for: Surface networks in the Arctic may miss a future methane bomb
Source: Copernicus journal article supplement (doi:10.5194/acp-24-6359-2024), 2024-05-30
Supplement: Supplementary file 1 [file acp-24-6359-2024-supplement.pdf]

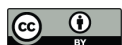

*Supplement of*

## **Surface networks in the Arctic may miss a future *methane bomb***

**Sophie Wittig et al.**

*Correspondence to:* Antoine Berchet ([antoine.berchet@lscce.ipsl.fr](mailto:antoine.berchet@lscce.ipsl.fr))

The copyright of individual parts of the supplement might differ from the article licence.

Table S1: *Selected atmospheric observation sites for this study, by decreasing latitudes.*

| <b>ID</b> | <b>Site, country</b>  | <b>Latitude</b> | <b>Longitude</b> | <b>Elevation (masl)</b> | <b>Operator</b>  |
|-----------|-----------------------|-----------------|------------------|-------------------------|------------------|
| ALT       | Alert, CAN            | 82.5° N         | 62.5° W          | 185                     | ECCC             |
| ZEP       | Zeppelin, NOR         | 78.9° N         | 11.9° E          | 474                     | NOAA-ESRL        |
| SUM       | Summit, GRL           | 72.6° N         | 38.4° E          | 3210                    | NOAA-ESRL        |
| TIK       | Tiksi, RUS            | 71.9° N         | 128.9° E         | 19                      | FMI/NOAA         |
| BRW       | Barrow, USA           | 71.3° N         | 156.6° W         | 11                      | NOAA-ESRL        |
| CBY       | Cambridge Bay, CAN    | 69.1° N         | 105.1° W         | 35                      | ECCC             |
| INK       | Inuvik, CAN           | 68.3° N         | 133.5° W         | 113                     | ECCC             |
| PAL       | Pallas, FIN           | 68.0° N         | 24.1° E          | 565                     | FMI/NOAA         |
| CRV       | CARVE, USA            | 65.0° N         | 147.6° W         | 611                     | NOAA-ESRL        |
| BLK       | Baker Lake, CAN       | 64.3° N         | 96.0° W          | 95                      | ECCC             |
| NOY       | Noyabrsk, RUS         | 63.4° N         | 75.8° E          | 100                     | JR-stations NIES |
| ICE       | Storhovdi Island, ISL | 63.4° N         | 20.2° E          | 118                     | NOAA-ESR         |
| IGR       | Igrim, RUS            | 63.2° N         | 64.4° E          | 25                      | JR-stations NIES |
| BCK       | Behchoko, CAN         | 62.8° N         | 115.9° W         | 160                     | ECCC             |
| YAK       | Yakutsk, RUS          | 62.1° N         | 129.4° E         | 130                     | JR-stations NIES |
| DEM       | Demyanskoe, RUS       | 59.8° N         | 70.9° E          | 75                      | JR-stations NIES |
| FNE       | Fort Nelson, CAN      | 58.8° N         | 122.6° W         | 361                     | ECCC             |
| CHU       | Churchill, CAN        | 58.7° N         | 93.8° W          | 29                      | ECCC             |
| KRS       | Karasevoe, RUS        | 58.3° N         | 82.4° E          | 50                      | JR-stations NIES |
| BRZ       | Berezorechka, RUS     | 56.1° N         | 112.5° E         | 150                     | JR-stations NIES |
| CBA       | Cold Bay, USA         | 55.2° N         | 162.7° E         | 21                      | NOAA-ESRL        |
| LLB       | Lac La Biche, CAN     | 55.0° N         | 112.5° W         | 540                     | ECCC             |
| AZV       | Azovo, RUS            | 54.7° N         | 73.0° E          | 100                     | JR-stations NIES |
| VGN       | Vaganovo, RUS         | 54.5° N         | 62.3° E          | 200                     | JR-stations NIES |
| ETL       | East Trout Lake, CAN  | 54.3° N         | 105.0° W         | 500                     | ECCC             |
| MHD       | Mace Head, IRL        | 53.3° N         | 9.9° W           | 5                       | NOAA-ESRL        |
| SHM       | Shemya Island, USA    | 52.7° N         | 174.1° W         | 23                      | NOAA-ESRL        |
| EST       | Esther, CAN           | 51.7° N         | 110.2° W         | 707                     | ECCC             |
| SVV       | Savvushka, RUS        | 51.3° N         | 82.1° E          | 400                     | JR-stations NIES |
| BRA       | Bratt's Lake, CAN     | 50.2° N         | 104.7° W         | 595                     | ECCC             |
| FRD       | Fraserdale, CAN       | 49.9° N         | 81.6° W          | 210                     | ECCC             |

|     |                     |         |          |     |      |
|-----|---------------------|---------|----------|-----|------|
| CPS | Chapais, CAN        | 49.8° N | 75.0° W  | 391 | ECCC |
| CHB | Chibougamau, CAN    | 49.7° N | 74.3° W  | 393 | ECCC |
| ESP | Estevan Point, CAN  | 49.4° N | 126.5° W | 7   | ECCC |
| ABT | Abbotsford, CAN     | 49.0° N | 122.3° W | 40  | ECCC |
| EGB | Egbert, CAN         | 44.2° N | 79.8° W  | 251 | ECCC |
| WSA | Sable Island, CAN   | 43.9° N | 60.0° W  | 5   | ECCC |
| DWN | Downsview, CAN      | 43.8° N | 79.5° W  | 198 | ECCC |
| HNP | Hanlan's Point, CAN | 43.6° N | 79.4° W  | 87  | ECCC |
| TKP | Turkey Point, CAN   | 42.6° N | 80.6° W  | 231 | ECCC |

Table S2: Additional observation sites.

| <b>ID</b> | <b>Site, country</b>      | <b>Latitude</b> | <b>Longitude</b> | <b>Elevation (masl)</b> | <b>Operator</b>   |
|-----------|---------------------------|-----------------|------------------|-------------------------|-------------------|
| SNO       | Station Nord, GRL         | 81.6° N         | 16.7° W          | 8                       | ICOS              |
| KJN       | Kjolnes, NOR              | 70.9° N         | 29.2° E          | 30                      | Univ. Exeter/ICOS |
| AMB       | Ambarchik, RUS            | 69.6° N         | 162.3° E         | 5                       | MPI-BGC           |
| TER       | Teriberka, RUS            | 69.2° N         | 35.1° E          | 83                      | MGO               |
| CHS       | Cherskii, RUS             | 68.6° N         | 161.3° E         | 23                      | IASOA             |
| SOD       | Sodankyla, FIN            | 67.4° N         | 26.6° E          | 227                     | ICOS              |
| SVB       | Svartberget, SWE          | 64.3° N         | 19.8° E          | 275                     | ICOS              |
| SMR       | Hyytiälä, FIN             | 61.9° N         | 24.3° E          | 181                     | ICOS              |
| ZOT       | Zotto, RUS                | 60.8° N         | 89.4° E          | 104                     | MPI-BGC           |
| NOR       | Norunda, SWE              | 60.1° N         | 17.5° E          | 46                      | ICOS              |
| UTO       | Utö, FIN                  | 59.8° N         | 21.4° E          | 65                      | ICOS              |
| BIR       | Birkenes Observatory, NOR | 58.4° N         | 8.3° E           | 219                     | ICOS              |
| HTM       | Hyltemossa, SWE           | 56.1° N         | 13.4° E          | 255                     | ICOS              |
| VHL       | Vavihill, SWE             | 56.0° N         | 13.2° E          | 175                     | PSI               |
| PLA       | Preila, LTU               | 55.4° N         | 21.1° E          | 5                       | FTMC              |
| CDL       | Candle Lake, CAN          | 55.4° N         | 105.1° E         | 600                     | ECCC              |

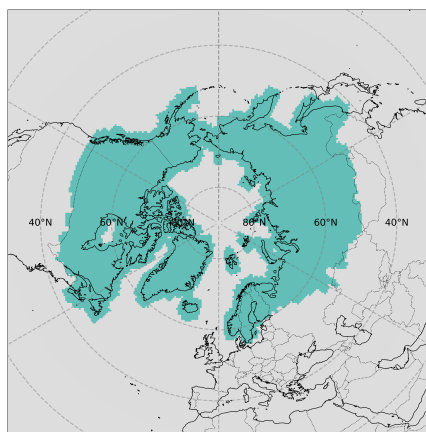

(a) Entire Region

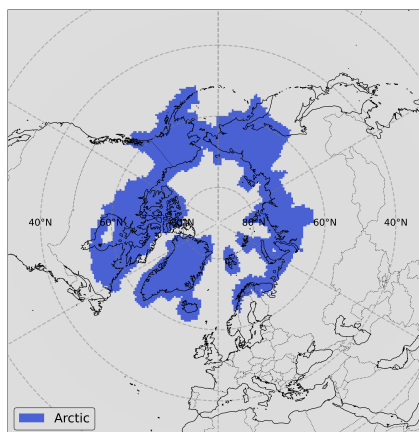

(b) Arctic

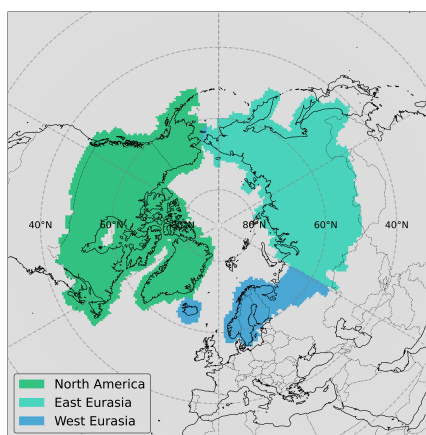

(c) Sub-continental regions

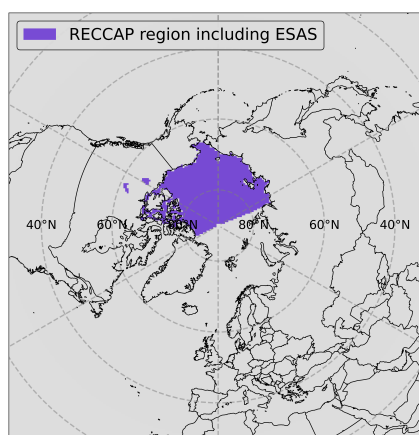

(d) Region including ESAS

**Figure S1.** *Supra-regions (figures a to c) used for applying trends on wetland and anthropogenic CH<sub>4</sub> emissions and RECCAP region including the ESAS (figure d) used for applying trends on oceanic methane sources.*

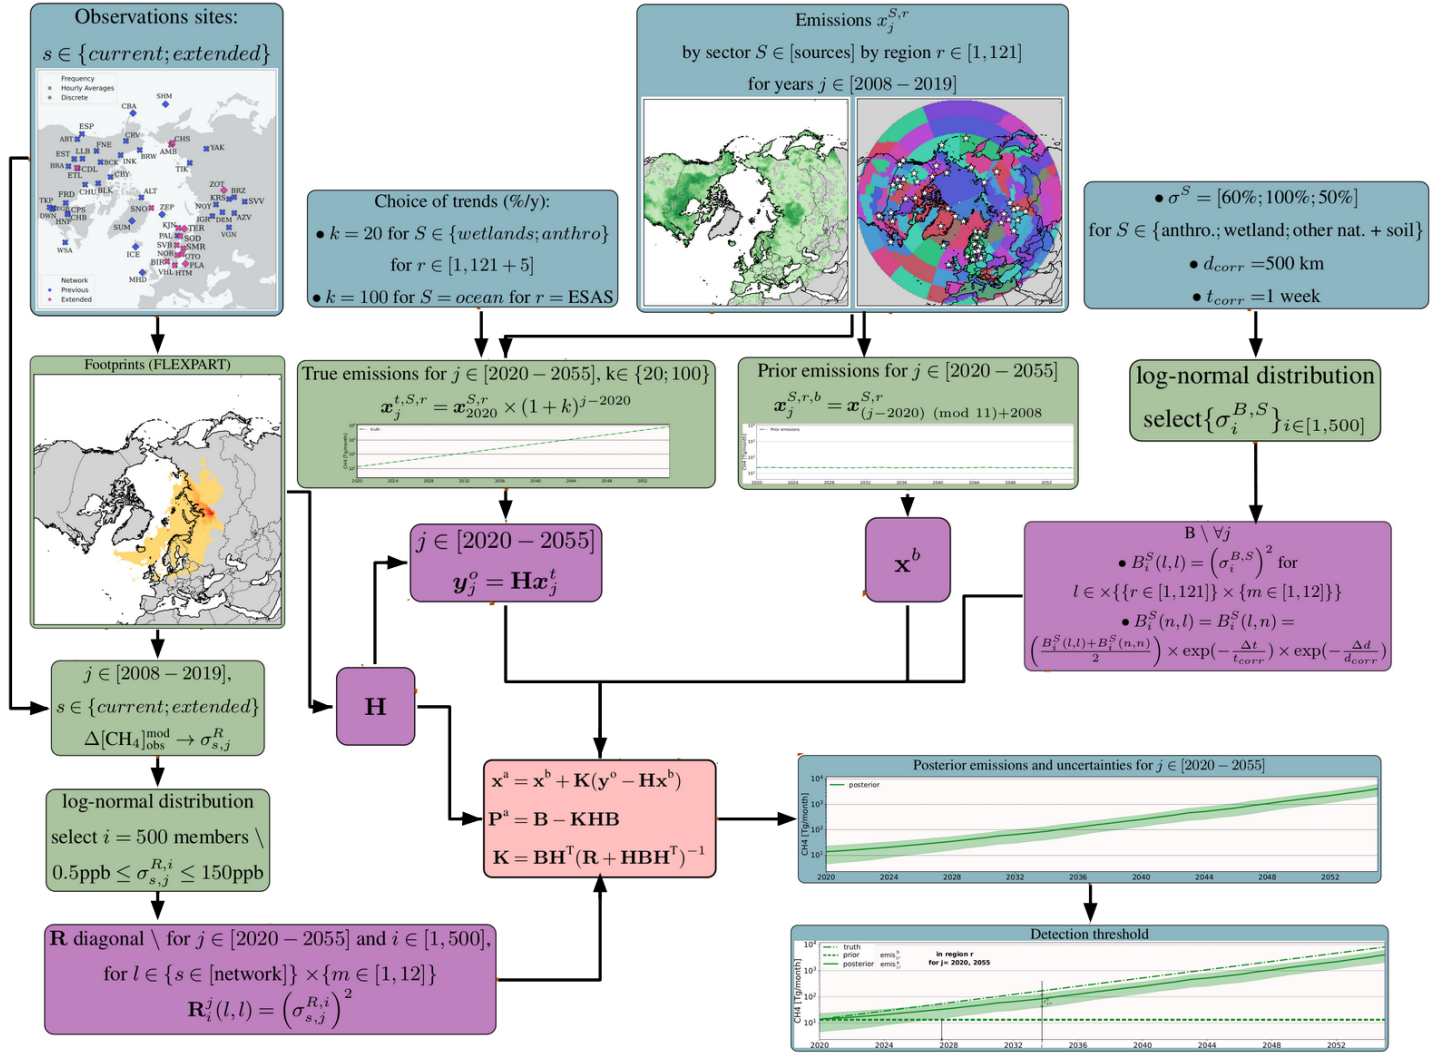

**Figure S2.** Principle of the inversion set-up used in this study. The observation networks, details on the CH<sub>4</sub> emission scenarios as well as the output data are shown in the blue boxes. The green boxes represent methods on obtaining the input data for the inversion. The red box shows the optimization strategy and the purple boxes the corresponding variables. See Wittig et al. (2023) for full details.
